# Supplementary material for: Discovery of 194 Unreported Conopeptides and Identification of a New Protein Disulfide Isomerase in Conus caracteristicus Using Integrated Transcriptomic and Proteomic Analysis
Source: Frontiers journal article supplement (doi:10.3389/fmars.2022.792908), 2022-03-01
Supplement: Table_3.xlsx [file Table_3.xlsx]

## Sheet: Supplementary Table S3
Supplementary Table S3: The 249 conopeptide precursors from 2 organs of 3 individuals Ca-1, Ca-2 and Ca-3 (Ca-1-VD, Ca-1-VB, Ca-2-VD, Ca-2-VB, Ca-3-VD and Ca-3-VB)
Name(Serial number_ Number of times detected)	Signal	Pre	Mature	Post	Framework	Superfamily	PTM pyroglu	PTM gla	PTM amidation	Closest	PID
151_1	MGMRMMFTVFLLVVLATTVVS	FTSDRASEGRNAAAKDKASDLVALTVR	GCCAIRECRLQNAAYCGGIY		I	A	N	Y	N	Ca1.2	100
142_1	MFTVFLLVALATTVVP	FTSDRASASRNAATDNKASELKALNAR	IPCCSYPACAQSNIDLCG	GRR	I	A	N	N	Y	Ca1.3	100
152_1	MGMRVMFTVFLLVALATTVVP	FTSDRASASRNAATDNKASELKALNAR	IPCCSYPACAQSNIDLCG	GRR	I	A	N	N	Y	Ca1.3	100
47_2	MGMRMMFTVFLLVVLATTVVS	FTSDRASEGRNAAAKDKASDLVALTVR	GCCAIHECRLQNAAYCGGIY		I	A	N	Y	N	Ca1.4	100
23_3	MKLFLAIVVILMLLSLSTG	AEMSDNHASRSATARRDRHLSPK	AWPCGGVRASCSRHDDCCGSLCCFGTSTGCRVAVRPCW		XI	?	N	N	N	Ca11A	100
100_2	MSTLGTMLLILMLLLPLATC	DGEGQAIQGDRGLDAVNSPVMRLLQGYKKTGRSTEKR	CRVENLCPHTVCCDRSRCSCKLIRTRPLMYHVCVC		XV	?	N	Y	N	Ca15.3	100
235_1	MSTLGTMLLILLLLLPLATC	DGEGQAIQGGGGLDAVNSPVMRLLQGYKKTGRSTEKR	CRVENLCPHTVCCDRSRCSCKLIRTRPLMYHVCVC		XV	?	N	Y	N	Ca15.3	100
236_1	MSTLGTMLLILMLLLPLATC	DGEGQAIQGGGGLDAVNNPVMRLLQGYKKTGRSTEKR	CRVENLCPHTVCCDRSRCSCKLIRTRPLMYHVCVC		XV	?	N	Y	N	Ca15.3	100
36_2	MEKLTILILVATVLLAIQVLVQS	DGEKPLKGRVKQYAAKRLSALLRGPR	ECTPMHRACEEDEECCPNLECKCSNNPDCQSGYKCRP		XV	O2	N	Y	N	Ca15.4	100
129_1	MEKLTILILVATVLLAIQVLVQS	DREKPLKGRVKRYAAKRLSALLRGPR	ECTPMHRACEEDEECCPNLECKCSNNPDCQSGYKCRP		XV	O2	N	Y	N	Ca15.4	100
19_3	MEKLTILILVVTVLLAIQVLVQS	DGEKPLKGRVKQYAAKRLSALLRGPR	ECTPMHRACEEDEECCPNLECKCSSNPDCQSGYKCRP		XV	O2	N	Y	N	Ca15a	100
1_6	MMSKLGVLLTICLLLFPLTA	VPLDGDQPADRPAERKQDVSSEQHPFFDPVKR	CCRRCYMGCIPCCF		III	M	N	N	N	Ca3-IP04	100
75_2	MLKMGVVLFTFLVLFPLATL	QLDADQPVERYAENKQDLSPDKRVEFILHALGQR	FCCVFPWCTGCYCC	R	III	M	N	N	N	Ca3-Y01	100
74_2	MLKMGVMLFIFLVLFPLTTLQLDA	DQPVERYAENKQDLSPDKRVEFILHALGQR	GCCIVPWCTGCYCCH		III	M	N	N	N	Ca3-Y04	100
94_2	MRCLPVFIILLVLIASAPSVDA	RPQTKDDALASFHDSAKRHLQRLVNAR	KCCPESPPCCHYYYYF	GRRK	V	T	N	Y	Y	Ca5.7	100
218_1	MRCLPVFIILLLLIASAPSVDA	RPQTKDDALASFHDSSKRHLQRLVNAR	NCCPESPPCCHYYYYF	GRRK	V	T	N	Y	Y	Ca5.7	100
220_1	MRCLPVFIILLVLIASAPSVDA	RPQTKDDALASFHDSSKRHLQRLVNAR	NCCPESPPCCHYYYYF	GRRK	V	T	N	Y	Y	Ca5.7	100
221_1	MRCLPVFIILLVLIASAPSVDA	RPQTKDDALASFHDSTKRHLQRLVNAR	KCCPESPPCCHYYYYF	GRRK	V	T	N	Y	Y	Ca5.7	100
68_2	MKVTYVLIIAVLFLTACQLITA	DYSRDKQENPVERSRIKMIKSWRPKLNKR	CTNPGGYCVVPHHNECCSGQCDPSSIIGQCL		VI/VII	O1	N	Y	N	Ca6.11	100
184_1	MKVTCVLIIAVLFLTACQLITAGYS	RDTQENPVERSRIKMIKSWRPKLNKR	CTNPGGYCVVPHHNECCSGQCDPSSIIGQCL		VI/VII	O1	N	Y	N	Ca6.11	100
60_2	MKLTCMMIVAVLFLTAWTFVTA	DDTRDGLKNLFPKARLEMKNSEASRSRGR	CRPPGMVCGFPKPGPYCCSGWCFAVCLPV		VI/VII	O1	N	N	N	Ca6.14	100
61_2	MKLTCMMIVAVLFLTAWTLVTA	DGTRDGLKNLFPKARLEMKNSEASRSRGR	CRPPGMVCGFPKPGPYCCSGWCFAVCLPV		VI/VII	O1	N	N	N	Ca6.14	100
170_1	MKLTCVLIIAVLFLIVCQLNTA	DDSRDKQEYRAVRLRDGMRNFKGSKR	NCGEQGEGCATRPCCSGLSCVGSRPGGLCQY	G	VI/VII	O1	N	Y	Y	Ca6.20	100
168_1	MKLTCMMIVAVLFLTAWTFVTA	DDSKNGPDTAGAWGKLFSKALDEMKNPEDSQLDKK	KVCLESGAVCVIPIIASFACCSAFCYGVCL		VI/VII	O1	N	N	N	Ca6.22	100
20_3	MEKLTILLLVAALLMSTQA	LIQGGGEKRQKAKINFLSKR	KSTAESWWEGECSGWSVYCEYDSECCSGECGGYYCELW		VI/VII	?	N	Y	N	Ca6.26	100
173_1	MKLTILLLVAALLMSTQA	LIQGGGEKRQKAKINFLSKR	KSTAESWWEGECSGWSVYCEYDSECCSGECGGYYCELW		VI/VII	?	N	Y	N	Ca6.26	100
161_1	MKKLTILLLVAALLMSAQA	LIQGGVEKRQKAKMDFSKR	KTTAEKWWDGDCMTWYAPCRLDSQCCSGNCGKHRCLAW		VI/VII	?	N	Y	N	Ca6.27	100
207_1	MMLKMGAMFVLLLLFILPSSQQ	EGDVQARKTHLKRGFYGTLAMSAR	GCSGTCHRREDGKCRGTCDCSGYSYCRCGDAHHFYRGCTCTC		VIII	S	N	N	N	Ca8a	100
91_2	MQKATVLLLALLLLLPLSTA	QDAEGSQEDAAQREVDIATR	CGGTGDSCNEPAGELCCRRLKCVNSRCCPTTDGC		XVII	Y	N	N	N	CaXVIIA	100
92_2	MQKATVLLLALLLLLPLSTA	QDAEGSQEDAAQREVDIVTR	CGGTGDSCNEPAGELCCRRLKCVNSRCCPTTDGC		XVII	Y	N	N	N	CaXVIIA	100
35_2	MEGRRFAAVLILTICMLAVAAG	ASRR	WGLCSLPAEAGPCYASITRYYYDRKTQECTQFYYGGCGGNSNNFDTAEECDDVC	G	IX	?	N	N	Y	Conkunitzin-Ca6	100
147_1	MGKLTILVLVAAVLLSTQVMVQG	DGDQPAARNAVPKDDNPGGEAGKFMNVLRRS	GCPWEPWC	G		O2	N	Y	Y	Contryphan-G	100
148_1	MGKLTILVLVAAVLLSTQVMVQG	GRDQPAVRDAVPRDENPGGTSRKFMNALRRN	GCPPGLWC	G		O2	N	N	Y	contryphan-like Pu3	100
149_1	MGKLTILVLVAAVLLSTQVMVQG	GRDQPAVRDAVPRDENPGGTSRKFMNALRRN	GCPPGLWCGD			O2	N	N	N	contryphan-like Pu3	100
82_2	MMEKLAVLVLVAAVLLST	QVMFRDQPAPRDAVPSDDSAGGMSGGFMNVRRRF	GCPWHPWC	G		?	N	N	Y	Contryphan-Vi	100
202_1	MMEKLAVLVLVAAVLLST	QVMFRDQPADRDAVPSDDSAGGMSGGFMNVRRRS	GCPWHPWC	G		?	N	N	Y	Contryphan-Vi	100
32_2	MAPSQKALLVLVLSMLLTASDSRA	RR	IDCTRFVYAPICRGVAA	KRGGDSLSVGSSTELDDALTDPFLRSEEPREEDTEKKWRELSRLSRVLQILLSHPTGETEQLDRLLTL		?	N	N	N	elevenin-Qc1	100
13_4	MSKLGVVLFTILVLLPLATLLLEA	DQHVERQQDLNPQRGTRGIMKHVMSKGMSRR	GCCTGQGCWNVPICECCV		III	?	N	Y	N	Ge3.3	100
97_2	MSKLGVVLFTILVLLPLATLLLEA	DQPVERQQDLNPQRGTRGIMKHVMSKGMSRR	GCCTGQGCWNVPICECCV		III	?	N	Y	N	Ge3.3	100
185_1	MLCLPVFIILLLLASPAAS	DPLEKRIQSDLIRAALEDADTKNDPR	ILEDIVSTALATCCKFQFLNFCCNE	K	V	T	N	Y	N	Ge5.5 precursor	100
83_2	MMLKMGAMFVLLLLFILPSSQQ	EGDVQARKTHLKRGFYGTLAMSTR	GCSGTCHRREDGKCRGTCDCSGYSYCRCGDAHHFYRGCTCSCQ	G	VIII	S	N	N	Y	Lr8.3	100
115_2	MYMSISYVSAVRTFFFPFLPREYVVQSICVTCAWCQRAWC	INPTPPPPLFPLSVR	CTC			?	N	N	N	M14.3	100
153_1	MGVVLFTFLVLFPLATLQLDA	DQPVERYVENKQDLSPDDRMGFILPALRR	YECCVWPHCDGGCSSCVRSCE		IV	M	N	Y	N	Mi4-VRS01	100
56_2	MKKLTILLLIAAVLMLTQA	LIQEKRPEDEIKFLSKRKSGAQR	WWDGECRLWSNGCRKHKECCSNHCKGIYCDIW		VI/VII	O2	N	Y	N	VeG52	100
169_1	MKLTCMMIVAVLFLTAWTFVTA	NDSRKGLENLFPMARNEMKNHEASQLNER	SCIEKGDFCGWVILSESCCTGFCFYVCI		VI/VII	O1	N	Y	N	Vr6.2	100
84_2	MMLKMGAMFVLLLLFILPSSQQ	EGDVQARKTHLKRGFYGTLAMSTR	GCSGTCRRHRDGKCRGTCDCSGYSYCRCGDAHHFYRGCTCTC		VIII	S	N	N	N	Ca8c	97.6
90_2	MQKATVLLLALLLLLPLSTA	QDAEGSQEDAAQREVDIATR	CGGTGDSCNEPAGELCCHRLKCVNSRCCPTTDGC		XVII	Y	N	N	N	CaXVIIA	97.1
214_1	MPKLEVMLLVLLILPLPHFHAGGHA	IQGTGRGHRMDQSFLRSVRMSQQRR	SWGPACQNRMCGGICCGSDSCGCKGNECDCP		XV	?	N	Y	N	Ca15.1	96.8
59_2	MKLTCALIVAMLLLMACQLTTA	DGPKGRQEYPTKRLRAKMPNSKFIKLIKR	CAAPGASCSKYDNECCDACLLRYPNPPVCIE		VI/VII	?	N	Y	N	Ca6.13	96.6
166_1	MKLTCALIVAMLLLAACQLTTA	DGPKGTQEYPTKRLRAKMPNSKFIKLIKR	CAAPGASCSKYDNECCDACLLRYPNPPVCIE		VI/VII	?	N	Y	N	Ca6.13	96.6
241_1	MVQLTFVVLFLLATLQVDA	DQHAERYAESKQHLNLNER	KQIILPALRDQECCSRSWCDGGCYCCKND		III	?	N	Y	N	Vr3-Y01	96.6
21_3	MGMRMMFTVFLLVVLATTVVSS	TSDHDPVSNHENRRASNRINQR	TWEECCKRPPCRVQHMAHC		I	A	N	Y	N	Ca1.8	94.7
167_1	MKLTCMMIVAVLFLTAWTFVTA	DDSINALEDLFSKARDEMENGEASTLNER	DCEADGAFCGIPIVKNWMCCSNLCIFACVPEY		VI/VII	O1	N	N	N	Ca6.18	93.5
62_2	MKLTCVLIIAVLFLTACQLITG	EQKDHALRSTDKNSKLTR	QCLPNGGYCTLHIHCCSNHCIKPIGLCVAT		VI/VII	O1	Y	N	N	Ge6.3	93.1
194_1	MLKMGVMLFIFLVLFPLTTLQLDA	DQPVERYAENKQDLNPDERKDFILPIVR	GCCTACHILPCTCCW		III	M	N	N	N	Ca3.3	92.9
2_6	MQLLFLYMPNTAALALIVLALARPKVLA	LALR	SACCCCCSCDL	G		?	N	N	Y
3_6	MRNLAVFLCLLAIVGLSSA	YWIDGLYGNQLYDEEEAARMFSEHKR	RDLTKSQDLCIPWRAPCPSDAKLSERYPFLRCCSGLSCRCTFWGNNCKCESRL	GR	XV	?	N	Y	Y
4_6	MVMVVSALSLAPNLT	APLPFLTSTTHRPSFPAAPFTLKAYTPFIFFTMLLPSSSSRLAISLKRAADLKSLSEELELVR	DAWICRPIVSGKPCW			?	N	N	N
6_5	MLGLPFTSFLATLVTSA	EVMPSTRLMRSAVLR	ICSLPRACSARSLSTASAPSLYMQIWAFSCFLAVSTSFSAKPVLVTAANWLKAARRTFSTSLACAMA		XIV	?	N	N	N
7_5	MPGSISAICFISAWPVTA	KVLAAR	EACTLGLLKCITCPSSLIMLTSSMPGMLFTDNFFNEVCNFLSSVVAVLWITFFFLLAVPFPPILTWSALA		XIV	?	N	N	N
8_5	MPRRVLFFVFLFFVVVNG	YFSFKPDLSR	NDSVIPLCAFQCERAHAT			?	N	N	N
9_4	MEKQMTLMIVAAVLVLIQVKVQG	DRGNSPKDVRKRLDDDGLQRARR	CLEVSESCNEDGECCAPYSCRCTTGSVCNRRCQA		XV	?	N	Y	N
10_4	MKLCVTFLLVLVILPSVTG	EKSSER	TRIGAVLKGHWCGYLGERGCRYHSQCCGDMCCYDRKCVVTAMPCDFPY		XI	?	N	N	N
11_4	MLRTRILMVLTVLSLLLDFVQHFES	TTKMHKVSALSYK	INSWNLYCFKKKKKNVPVIHPPCLFPFSHKPQEMKLCRHRDAVARNYIVSVGIVH			?	N	Y	N
12_4	MMSPLLFNNFVIIFFFAFVFS	KLR	KYLVFFSPSSIHFSRALVCAPLAFSMLIISNCCFKLSSSRCRSSFSGSLIISFSTFLNRILMSS		XXIV	?	N	N	N
14_4	MSTLGMLLLIALLLPLANP	ADNGDGQAKPRSRNLRSLDFGRIPRRLDKR	GCDPTPGCQTTVCVTDTGPCCCPHDYNCQTTNSGRRACVRVCPHNCPP		XIX	?	N	N	N
15_3	MAMNVWMTISVFVVVVMATTVIG	STASQEQERNGNGRSSR	KCCAMKSYQCLRDQGCLNPINSNCAIQCKTTDTSSCGSTVGDNCCSTYKACLVDCQISRGDEHGDPLLTCYNYCDQQHPC			?	N	Y	N
16_3	MDARRVAAVFLVFSMARMRA	DPDPR	CLEPLVLGNPSCTQRRVRLYYNKEDVACHTFVYTGCGGNNNNFYNVDDCRNCCRWGHQCNPAS	R		?	N	N	N
17_3	MDPLVGWLFFFLLNEPEG	GKK	GRHLCHFFQLTSKENSLVQRLGFCCKFLSCMSMSKGQVNLLLVSI		XXIV	?	N	N	N
18_3	MEKKMQLLVAVLLLEAIFLQG	YKVTSHR	PCCFGDCRPAC	RR	I	?	N	N	N
22_3	MHFVYAFVLVYVFRCLILMLYVLC	AISPWNSGLLLLYK	MHCCSCCRCLYLRVFLMFPYVLRLSCP	KKGSQNNETR		?	N	N	N
24_3	MRFYMLLAVALLLNSVMS	TDDVSVRQTDARR	PFSPDNPCPPAVPYYCLSLSADTCCKTACDSGNRCNSGTYQLW	R	VI/VII	?	N	N	N
25_3	MVSVSVTPVSVAVGGLMVMTGVGVA	RTWRRRR	LRACCCCCC	RRVLVTLQPTTG		?	N	N	N
26_2	MAAAVLLFEPNPLAEFPVLLPKALA	FPEFSPARAVSNLPRFPMLPPK	LPPVFPPIFPDAACCKSAKYWGPKAPRLLNCIHKLEVICCIFFCSFSF			?	N	Y	N
27_2	MAACMCLVATMACWINIFLTCTS	LILRPESGLR	STRAAKAPVQGVGSAAVPWGPRCTCSVEPAPGHHWRV			?	N	N	N
28_2	MAMNMWMTFSVCVVVVMAATVVGS	TPLQEQGLGLDER	RNPGCCPWEFYDCLIQRRVWRTRLDICYNQASRICAPGRSGGCCPGLLRCFERCRARDSAVCYYRCKFALCWM			?	N	N	N
29_2	MAMNVWMTISVFAVVVMATTVIG	STASQEQERNGNGRSSR	KCCAMKSYQCLRDQGCLNPINSNCAIQCKTTDTSSCGSTVGDNCCSTYKACLVDCQISRGDEHGDPLLTCYNYCDQQHPC			?	N	Y	N
30_2	MAMYAVLFLFFVLNFVLFRFPHLFL	KKPIAYSIMHVMLFSDR	PACCLLSCADSHCFS		I	?	N	N	N
31_2	MANHILSFRVLLGFILTAGFLFCSLSLS	DLR	KQNHECILSCLLPVLIHLSLPPPFPLVTLFV			?	N	N	N
33_2	MASVQHAWLALVLGALLWNLAAVGA	RDGHSYNYQHTRPAQRMVGKDAAGNTDEDFKGTR	GMTCPGGVPCPYTTCCLTKTGVYGCCPYYLGTCCPGGLSCCPWFYACVGNTCRLVSKILPALPKWPASLRPGA			?	N	N	N
34_2	MCVCCLLCLFYYVFGTFISVVCC	EVNRIKVNVGFGDSRRKKNVSAMLKER	LCSLSADRIVNNPPHFILQWRGRWEC	RKETQTNGMESTILRK		?	N	Y	N
38_2	MEKQMTLMIVAAVLVLIQVKVQG	DRGNFPKDVRKRLDDDGLQRGRR	CLEVSESCNEDGECCAPYSCRCTTGSVCNRRCQA		XV	?	N	Y	N
39_2	MENNLSLTRAAVLLMLLLVVSVISVES	LSERETQRKGTGIFRTPASKRDQMFKR	GVCNKASCTNDNECGGMCECCEGSCVFWTYN		XXIII	?	N	N	N
40_2	MEQQMMLMSAVLLALLVSCASA	LPSDDSVLQGSALSVNKRPKYMDTRDLDIFKFMLMSSIRDLVEDGQLNSAVLTQGDEDEQSDLKTVAKR	MRYMGICMRRRQNTFIPYPCLRSA			?	N	N	N
41_2	MEVRPMLFTICATGILPMYLQS	TWIRFVWLFSLSPTANETVVQTFIDTR	NPICFLSCASCFPLVRTFMMSLNWKGI			?	N	N	N
42_2	MEWAGIFSRAAVRAVFIVISFSLICHWMIC	RQGVSSGVDLLRQGPRTFISSR	ASGHPLCSCMDGSLGSLMTRTGTSEQMVSKTSVLTRMKLE			?	N	N	N
43_2	MFANRFVFGITLVVLGRLYFHSGA	FKTILLTTK	CCFWSWCCFTSVTTDKVY	K	V	?	N	N	N
44_2	MFSVFLWLFFFPRSLYS	PAPFRMYR	LCIFRILFHLHGQIGFCHLHHKLHFLTH			?	N	N	N
45_2	MGKLTAFLCLVMVMVWIQVMVVS	DQDKPLNKRRYLRQAQSLRR	VRNCKREGVECEERSECCFGLICKEEACKHVSPGPGRAVDDRAATIRQ	KKR	VI/VII	?	N	N	N
46_2	MGLFSPPTMLSSALFPFSGCISS	LSTDADWAER	DLANSEGKSSPSVWLLRAGCLNEDKKGSPPIGSFPGFPLCLPFLSSASPALSPSVSSVLLLVEVSSAGFVSAWGLLTRGGRFSSPSSE			?	N	N	N
48_2	MHPLDLMFQIVFTVIFTAVAG	DDFLLLQQQQLSLKSFVFHLQRQQLR	CAVLLVPRLPFLCILQAVVNSLSLCLHLSQLGEYVWVVSSILKVGLSHCYDFSHQRVSVIDRINEGFLPRLLLLYVIDWAPSLCKL		XIV	?	N	Y	N
49_2	MIFFSTLFFASLAPIVFP	TVLHLMPDLIR	GDVKSCQMAAVAFALETLLGTPVALDDEGSLAETSKTLQQSRVKLSVEGNLKLTQFLFLHQNWSSSLRKLSEETRRPRLENVLALGKPILSCE			?	N	N	N
50_2	MIFRVPYTTSWSVLFLFGLFPHEA	RR	LQLGWVTVTQCKLFLSTFSPLGTPNCRGILSRHVSNTVLFLATFLF			?	N	N	N
51_2	MISFFFSSVLSVTLNILGLFPPSLP	SLTGSVTSSASTSTSFASRDLAASRSSSFLSELTVLALSFR	FTKTTFFFLFSTSNFSSNISRSCLSTTSSIFSSNFSLINPFSCINKTQSRSS	RRFSK		?	N	N	N
52_2	MITMSTLGMVLLLLLLLLPLGNS	DGDGDRQAMDRDRTAGEARSLPRLRLKRHRDHGRSAGKR	CSTKMCGEICCPSSSCECVVHGSQGNEEGCSCPD	R	XV	?	N	Y	N
53_2	MIVLHAPLVVLHWILHAILVLTLC	WWEVSFQMHVSSSPQTHFPLDKR	ISGSFGLHLVCLWMSVYHMDKDCCGLMCILIQSATKYCRSIQILSFPQHSILECIIQQLLTNLWFCT		IV	?	N	N	N
54_2	MIVLKSRWLLPILSALCMSLSRRLMSMMKSFSLSCCSTMLTSLACS	EFVKK	VSTCWLTGDFVLCASSGGRYLAACLSANP	RKDRNFS		?	N	N	N
55_2	MKACPLLIIFLLAVSPLIVAA	VVLDGPRVKRLSGRVLKR	TVCYEVNSPCSNPAGCCTGFECYDGTCMPMNPL	GRRLDE	VI/VII	?	N	Y	Y
57_2	MKLCVTFLLVLVILPSVTG	EKSSER	TRIGAVLKGHWCGYPGERGCRYHSQCCGDMCCYDRKCVVTAMPCDFPY		XI	?	N	N	N
58_2	MKLSVTFLLILMLLPVIA	GEMESDKHTLWDILKRSKR	QPPYEICCYGFPQCADGWQCGSN	GR	I	?	Y	Y	Y
63_2	MKMSVTLIVLLVLGLSFTDG	AILHNINEREASGLHNPDAEVQLNLR	VECVGDCVVCPLTRNCKDQ		XIV	?	N	Y	N
64_2	MKMSVTLIVLLVLGLSFTDG	AILRNIDEREASGLHNPDAEVQLNLR	VECVGDCVVCPLTRNCKDQ		XIV	?	N	Y	N
65_2	MKSSLLLLAVLFLMTSLTVGRTRG	TPTPNQGKEKRSEDTRQQR	YEKCRPLFSSCQKDSECCSRKCRQYC	G	VI/VII	?	N	Y	Y
66_2	MKSTLFLMVLMAAVFLTFFTETDT	TSIFKATGKR	ADSEEFPCAGTFADCRGQPDRTTCCDTGACYGEVCYY		VI/VII	?	N	N	N
67_2	MKSTLFLMVLMAAVFLTFFTETDT	TSIFKATGKR	ADSEEFPCAGTFADCRGQPNGITCCDTGACYGEVCYY		VI/VII	?	N	N	N
70_2	MLFSQLRLLGHFRSLLVILMGATDVSIIWG	RQDR	LCTKSTCLL	RKLI		?	N	N	N
71_2	MLFSVLECLIGCSAFFVFCLLLFIPPRILA	FLLGAFFVTESLIRR	CPYPPDGEDCNGIRTFSWARFYLLGSSWSYTQWLWYCVYVDIEERAGIQTEPIADLWQCHTDIT	K	XIV	?	N	N	N
72_2	MLFWFLCAADGLVILLHICCITGSRT	ISRVVAVVLDHFLR	KSHCTVCVCSQSSWKCVLLSHFLACCVFALCCLPTCMNMIIMKSPETCTHTYF			?	N	N	N
73_2	MLGASPGAALAGPLLALGVAGRSLS	DMR	HVGQDVSCSSQDLRQELWNKWPQGSLRAASIFSQQMAHSSAFSSRSSWVAIGNLACMLRTT	RR		?	N	N	N
76_2	MLLIGPVEFCCLSLRPSLP	APPPVLVRLQDEGQVTR	CVCHSGCSSTPDRQECCTRCLRMASCVVVCETKWCPRDLWSGLDKEGVGQVAEWPRAGGDGLIVWSAERPLGTKVLCSMLSGWRS		XXVIII	?	N	N	N
77_2	MLLLYFFHLRIFLFFVFWGFVFLILWMLLVRFLLLVLLRLLLCCLLCEVLLLLLLSGLLG	RFGGLELKHGFFGHLHGR	RCC			?	N	N	N
78_2	MLLMFFNAFGQGAEG	ER	EGMGSHMNSRVGQFVNMTLLCRTMYWAPVVTIQIQSLCCLQGGSCPRYHLATSL		XXIV	?	N	N	N
79_2	MLPFSNSCVALVAISFWASVGA	GMLVLETSPLLVLLLSK	TAVFACCDCC		V	?	N	N	N
80_2	MLRPRMLFRCRPVLTLPGALEWQWTNWGWWPTRQMASSPLMTAGSTWS	SRR	PSPPMCCASCVAMV			?	N	N	N
81_2	MMCLALLCNILQLLCG	LFKVR	FHTLQFCPTALLLFSQCCHKVLLCFQINCKCFHMACECFQFPCLCIKTVFKCGQLFSQMVFF			?	N	N	N
85_2	MMMHALFGILPATLHKLPVAQQ	LSNILHHK	CAQVWHVLTGSQTPSFARSTVERFCLGILFLLESLIGAIIHARTSGSTLNHKHSVEAVFTTC			?	N	N	N
86_2	MNCLQPLLVLLLISTITA	LYQDDQATPRRDRTIRTMSNLLHIPKR	ECPYGCPVRCPDRDECCSGITCTYNAPGSTEYFCIGCGGGGGE		XIII	?	N	Y	N
87_2	MNMWMTLSVLVMVVMAATVVGS	TPLQEQGLGLDER	RNPGCCPWEFYDCLIQRRVWRTRVDICYNQASRICAPGRSGGCCPGLLRCFERCRAMDSAVCYYRCKFALCWM			?	N	N	N
88_2	MPAIPICLISMVILKDSAA	KAWRMPQEVYTNRKYRLRARRSGLVGGRVVR	FCSSGWSVQRLSATSPASSAPSLTANSSSSSAIHPPPTALPYSCSVLHVA			?	N	N	N
89_2	MPSSPRVRCMMLSWLVALPVSPRSRA	FYKSSSVARSSTR	ASTLMKLLPMVLPCRLLFLLVRAPARSKTFCCSMLHLCPLVLRPLVV		XXIV	?	N	N	N
95_2	MRNLLFLLCVHLYFSLFA	FRYKNSSVWGVIRPKFGPR	TCCSYSCGLHFVQ			?	N	N	N
98_2	MSMPSRTSVVMALVVGVLP	REAHIRTSSMLRGSNSLR	GDFPPLSSELLVSSSLGQNGSCPPCPCTLDRLTRSKAAVRQ			?	N	Y	N
99_2	MSTLGMLLLIALLLPLANP	ADNGDGQAKPRSRNLRSLDFGRTPRRLDKR	GCDPTPGCQTTVCVTDTGPCCCPHDYNCQTTNSGRRACVRVCPHNCPP		XIX	?	N	N	N
101_2	MSVDLLVLSLYSMLFCTVFP	SVQDQR	QNHWHPFTITVSVNISLCPLSSLFSFVSFVLPSPFPPYNSLPGPHTHSLLSLPFFFISSSISSPCFSLSDRNKRITGVICRTDAYHFS			?	Y	N	N
102_2	MTGAMCFSENPLLSVFAPLPQSSRTLG	SLPSTLTPMTLSRR	SGLCTRCMTSPRLTGNWRTS			?	N	N	N
103_2	MTKRIVAVFVFAVYS	FINDFLVNVR	QMVSLYVFFLNIICCSLYLCSSRC		I	?	Y	N	N
104_2	MTSATLFFLMSVTLLFFVLS	ATRRSFYRVSHLAVLHIFPRR	CFSICQPPCCSLYCQLRCCSSAC		XVII	?	N	N	N
105_2	MTVCLPGVFVCLFSLFLFA	HER	EQIFNLYSLELPSSPPSTLTPSPTINLPTPPSPSHLLFFPPKPSDNDVLVLCACAVMVWWWW			?	N	N	N
106_2	MVAYIFREILLLLTVVRSSG	DTAHERKKK	SLKSGSPSCHTLRMTCRVEFISIEMPLPKPQNWHMCVV			?	N	N	N
107_2	MVDRGILSSLDALLPALPFFSSLA	KTPSFPGRAAGGLWYVDKR	LKCLAGKHRDCFVVKSDFRGGI			?	N	N	N
108_2	MVERGILSSLDALLPALPFFSSLA	KTPSFPGRAAGGLWYVDKR	LKCLAGKHRDCFVVKSDFRGGI			?	N	N	N
109_2	MVPQAVLPAKKFKLLGVPYLSCCFYCHVMG	DVHINKK	IFHIQSTTGTDCLKAMMTQMWIICNVQSCCQMISCSSFQFA	KRQLNDSNIYTTFNPTDISLYSQQQDIRTNTVPVFLQWNTNLS	XVI	?	N	N	N
110_2	MVSAFSLLAMSLRVARG	MSLMLQLK	ISAGRSSISPSHAGLLAMMLLSHPLCVCFLSSLYVLHHAALRTLC	R		?	N	N	N
111_2	MVSFRGDHAQTGMGAWLGGLFVGIGWVQP	QLTVDPGGR	FLSCLGRFNGNIGTLVGESLKLGPNTAHSRICCRFLCFRLTKVGFILDGSLDTLLLAIPSSWLIYLSCDLSSPC		XXXII	?	N	N	N
112_2	MVSLYIFVVVSDVFLA	AHLTGPFNVSAELLAAK	STSPGNTNIFMSVWICQEFRLGCCLDVLVHICFCCCCYYICVVKLI			?	N	N	N
113_2	MVSTPFCAPISLLPRLHLALSPLSA	SKASVR	LSCGRMVFLVPSRVVQTLWRIGAVGPCSLSATMESWRS			?	N	N	N
114_2	MWLSFVLQLITPLFVSA	LLVGR	KCNLRGIYSNICCNICINFIYSIFHH	KKQ	XXIV	?	N	N	N
116_1	MAAALMSVGPLSIALDATLL	QFYRR	GVFAPFIGCSKTTLNHAVLLVGWGVEKGLLENKPYWKVKNSWGQTWGLQGYFLIKRGVGECGLNTQVTTAVLQ	K		?	N	N	N
117_1	MAELVPPRAPPAAAAVATATAATAAA	SRKGSRR	QGRHGPSGCRQPHDQGPPPTSTSPTPFWAAPATWTTCC			?	Y	N	N
118_1	MAIPSVPSASIVTLVIILTSLNIPA	NDIALLFAVEWYLDRIR	TSCNVISHTFCAAVTYRFCQRELQATSLTSDPHPLPTQCDMEVPPPSTTTAV		XIV	?	N	N	N
119_1	MALTISSFVISIFLRVIA	TFRSLLGSR	SDTACLECFFRALGVPLTEACSGPAGP	RRNTSSNSLKSITE		?	N	Y	N
120_1	MAMNMWMTFSVCVVVVMAATVVGS	TPLQEQGLGLDER	RNPGCCPWEFYDCLIQRRVWRTRLDFCYNQASRICAPGRSGGCCPGLLRCFERCRARDSAVCYYRCKFASCWM			?	N	N	N
121_1	MAMNVWMTISVFAVVVMATTVIG	STASQEQERNGNGRSSR	KCCAMKSYQCLRDQGCLNPINSNCAIQCKTTDTSSCGSTVGDNCCSTYKVCLVDCQISRGDEHGDPLLTCYNYCDQQHPC			?	N	Y	N
122_1	MASFALLSYCMLIAPNVIL	MSSPFGTRR	CFHAREFKARAEPKASQKHIYTLTPFPFPNPRIPPPSPLFYPPSPPITHHPFSLLYNYCVLVNDITVLFFSGMEHSSNFCP			?	N	N	N
123_1	MCPYAFMLFYFLLGGLRGGWG	LNTKVFESMSLVLISDWKKVGRPEDEWR	IECCCCADLYIIPYVVIICQ			?	N	N	N
124_1	MCVCCLLCLFYYVFGTFISVVCC	EVNRIKVNIGFGDSRRKKNVSAMLKER	LCSLSADHIVNNPPHFILQWRGRWEC			?	N	Y	N
125_1	MCVCCLLCLFYYVFGTFISVVCC	EVNRIKVNVGFGDSRRKKNVSAMLKER	LCSLSADHIVNNPPHFILQWRGRWEC			?	N	Y	N
126_1	MCVFGLLFFSLFVILFPYFFP	LIDRYLTKK	VFNHNCICICLATINAILSPFFPRLL			?	N	N	N
127_1	MDARRVAAVFLVFSMARMRA	DPDPR	CLEPLVLGNPSCTQRRVRLYYNKEDVACHTFVYTGCGGNNNNFYNLNDCRNCCRWGHQCNPAS	R		?	N	N	N
128_1	MDKLMILLLVAVVLLTQVMVQS	DQDKRSRGRGQRLARR	NYLWIQTCSESSEPCTSPADCCHGRTCRCIAPSACIPNTHGRCMN		XV	?	N	Y	N
130_1	MEKLTILLLVAAALISTKA	LIQDGGEKRQEAKLNFFSKRKASSKR	WFGHEDCTYFLGPCEVDGECCSDSCEVKFCGLW		VI/VII	?	N	Y	N
131_1	MEMIFVCLSLLFFFSLSPLLT	RFVWPSPLLRLISHAVRR	TLHTVEFNPTSIGLCLLRSSAPWLVCCSSCCCCCWFHA			?	N	Y	N
132_1	MENNLSLTRAAVLVMLLLVVSVISVES	LSERETQRKGTGIFRTPASKRDQIFKR	GLCDKTVCTNDNECGGMCECCEGSCVFWAYN		XXIII	?	N	N	N
133_1	MENNLSLTRAAVLVMLLLVVSVISVES	LSERETQRKGTGIFRTPASKRDQMFKR	GVCNKASCTNDNECGGMCECCEGSCVFWAYN		XXIII	?	N	N	N
134_1	MENNLSLTRAAVLVMLLLVVSVISVES	LSERETQRKVPGIFRTPASKRDQMFKR	GVCNKASCTNDNECGGMCECCEGSCVFWAYN		XXIII	?	N	N	N
135_1	MFADRFVFGIALVVLGRLYFHSGA	FKTILLTTK	CCFWSWCCFTSVTTDKVYKQDRLVLSIQST		V	?	N	N	N
136_1	MFALLTLLPFPTFFSYLSPVHL	LTFAYLSMLSFR	ALTYLSVDICLDVCVPFLTATFVCPSF			?	N	N	N
137_1	MFANRFVFGIALVVLGRLYFRSGA	FKTILLTTK	CCFWSWCCFTSVTTDKVYKQDRLVLSIQST		V	?	N	N	N
138_1	MFLKLLLYCWKNVMLLFSPLLFICSTCHC	LVSHTRRLHISGDLNQR	SSAHFAHCVAHCCQHWCD		XXIV	?	N	N	N
139_1	MFPGCPALVSIVSVPLWRMPPPPSTHS	AQPGHTPTPGMDNESTQKFTFYIFNDDSISR	SLPKLCDMRDAHAQICHV			?	N	N	N
140_1	MFSCQFLHCLPLLLPPLMVPC	MIVLDR	LVCVECVVCPDHISLPSLHS			?	N	N	N
141_1	MFSSGRFIVCAMLVIFLPCHT	RR	FTYTQPHPVLSCCIFQQDTTSMFIIMSIILAFHDQRAAM			?	N	N	N
143_1	MFVIPMTFTFIVLPGSTSA	QTRKK	VFIFLKLLKEFSYVFWGFFYYFSRNITCSLSANVGVCTSKEKTRIISFELYTSNEEQYLVELYSTEQQPSIATHGMVGEGEPALSCTVSTLND			?	N	N	N
144_1	MFYFVVLDVGIVHAAQA	LSEGMRVVR	VKGASIKGEVCGDAVLILTAGLTCVALGLVVTCWRADTPCCTVICEKTRQPLS		XXIII	?	N	N	N
145_1	MFYVFFFPPIALHCTTCLA	EMFVR	GMTLDCCPKGEHLRMLLLLPLLPPLWSCIPPPTSAPGGLCSLVNGLPELT		I	?	N	N	N
146_1	MGKLTAFLCLVMVMVWIQVMVVS	DQDKPLNKRRYLRQTQALRR	VRNCKREGVECEERTECCFGLICKEEACKHVSPGPGRAVDDRAATIRQ	KKR	VI/VII	?	N	N	N
150_1	MGLFLAACLAWTQVLG	RSPFLAEDLAIFIGLGER	CFRTRGELDCGIPSSHLSTSLAFGVSRCLLMTDLIWS	KKLGLLLSSLFPSF		?	N	N	N
154_1	MIAYNFFFCFVSFVHISAS	GPRFPSPSSHVGLFTPLGYSFATFSSSRLHRWR	SCHCCCHCCWPHLPHWSRW	RRLR		?	N	N	N
155_1	MIFPQSVIFPRPFFTILSFPMHLSHT	PPPPPIFFFFFFKR	NATFCLANCY			?	N	N	N
156_1	MILKVIFCSFVYVVMECPCLLP	GPPLLVITVLDVNYR	LMFTCQSACTAHIDYRSHMLD			?	N	N	N
157_1	MILLLVAVVLLTQVMVQS	DQDKRSRGRGQRLARR	NYLWIQTCSESSEPCTSPADCCHGRTCRCIAPSACIPNTHGRCMN		XV	?	N	Y	N
158_1	MITIIALITIIITVIITIS	TPMIPSLTALFSFNSHFALNMR	SGFSFIFTVLNVVCFCLKT			?	N	N	N
159_1	MIVLFLALAVLLTSFTEA	EGSLAYELRKNSMAKR	LNCPTCHGKMCCKPNECYLVMCGRGSSLF		VI/VII	?	N	Y	N
160_1	MIVLKSRWLLPILSALCMSLSRRLMSMMKSFSLSCCSTMLTSLACS	EFVKK	VSTCWLTGDFVLCVSSGGRYLAACLSANP	RKDRNFS		?	N	N	N
162_1	MKLFLVIVLILMLLSLSTG	AETTDNRARSVTALRDTLLRPK	SSYCGWDGKPCWDDFDCCGSLCCVGNCHITFVPC	K	XI	?	N	N	N
163_1	MKLKLLPFCLPVQPLCG	QFIPTFRGKAFSDEDSSR	LLFFCLYGPFSCLFTENFHKSFHLLALHDMSMILMLCGSQFLKIVHTVHREHELSLRHCLLPLGPFHVCFCGIEMFFIYSSFFPPSLTRDQEIKGMPGPFRTNLNKLE	K	IX	?	N	N	N
164_1	MKLKLLPFCLPVQPLCG	QFIPTFRGKAFSDEDSSR	LLFFCLYGPFSCLFTENFHKSFHLLALHDMSMILMLCGSQVLKIVHTVQREHELSLRHCLLPLGPFHVCFCGIEMFFIYSSFFPPSLTRDQEIKGMPGPFRTNLNKLE	K	IX	?	N	N	N
165_1	MKLKLLPFCLPVQPLCG	QFIPTFRGKAFSDEDSSR	LLFFCLYGPFSCLFTENFHKSFHLLALP			?	N	N	N
171_1	MKLTCVLIVALLFLTASQLITA	GDSGDEYLAVGDEMQNSEDSKSRR	DCTPEGHGCSETTCCPGLTCSGPRQAQLCH		VI/VII	?	N	N	N
172_1	MKLTCVLIVAMLFLTACQLITA	DDSR	NTLKDPEESSSDEVQKSEDNMLIESCPKFGGKCDPVRHDCCNGRCFEFFGECLLDWPDV		VI/VII	?	N	N	N
174_1	MKLTYVMIAAVLFLTASTFVTT	DDSRDELEKLFSKARHEMKNRRASTLVKR	QCIEDGGYCGVPIIDDELCCSKICRILCVSV		VI/VII	?	Y	Y	N
175_1	MKMSVTLIVLLVLGLSFTDG	AILHNIDEREASGLHNPDAEVQLNLR	VECVGDCVVCPLTRNCKDQ		XIV	?	N	Y	N
176_1	MKMVIVMLMCCVLVLTFSVTSTRG	EVDEKEIREEIAARSSDDDEGFLRATSLGIKKR	CPKVCYGQCCSSSSCQCVDNHNGRGCSCPV		XV	?	N	N	N
177_1	MKPVPMCVWWMTFLCAGETLLISA	KK	WWWASVIPCVDSDASDQSKSSAVTVTVLLAALAQDLRIVCCARITCWTTSVSATVRPRPTPKCRPVSDSRSCLPTYVFRTPAQFL	G	XXXII	?	N	N	Y
178_1	MKSSLLLLAVLLLMTSLTVA	DSMFLGRTRGTPSPSQGKEKRLEDTR	HHGEKPEQPGGKCLPLFYPCEKDSQCCDRICKGHCIPNY		VI/VII	?	N	Y	N
179_1	MKSSLLLLAVLLLMTSLTVA	DSMFLGRTRGTPSPSQGKEKRSQDTRHHGKK	PEQPGGKCLPLFYPCEKDSQCCDHICKGHCIPNY		VI/VII	?	N	Y	N
180_1	MKSSLLLLAVLLLMTSLTVA	DSMFLGRTRGTPSPSQGKEKRSQDTRHHGKK	PEQPGGKCLPLFYPCEKDSQCCDHICKGHCIPSY		VI/VII	?	N	Y	N
181_1	MKSSLLLLAVLLLMTSLTVA	DSMFLGRTRGTPSPSQGKEKRSQDTRHHGKK	PEQPGGKCLPLFYPCEKDSQCCDRICKGHCIPSY		VI/VII	?	N	Y	N
182_1	MKTAFWMMVMVMMTVMMMMMVVEG	FTVGGHVHESHGPQLRGHLDDSIHDDNTIHQRLFTRLPLENKDDHRAVDLAAGAGADNMKLQRQTR	FCCTIPMWFCCKSLKAQTPLNWPTEITLE		V	?	N	N	N
183_1	MKTTFWMMVMMVVVVVGFTVG	GHVHESHGPQLRSHLDDSIHDDNTIHQRLFARLPLENKVDHRSVDLAAGAGADNMKLQRQTR	FCCTIPMWFCC	KRLKA	V	?	N	N	N
186_1	MLFWFLCAADGLVILLHICCIAGSRT	ISRVVAVVLDHFLR	KSHCTVCVWSQSSWKCVLLSHFLACYVFALCCLPTCMNMIIMKSPETCTHTYF		XII	?	N	N	N
187_1	MLFWFLCAADGLVILLHICCITGSRT	ISSVVAVVLDHFLR	KSHCTVCVCSQSSWKCVLLSHFLACYVFALCCLPTCMNIIIMKSPETCTHTYF		XII	?	N	N	N
188_1	MLGCFFAFLTCSRIAVVAVFLAVAVVGGDA	GEVYFFWRGLRFFGVGIRGVFGGVRPQR	CGGRTSDGVLLVMSLCFVSGVFVGVLPILKFLRIFLSIHLSFLGLDCAVVRSFLVLVHDVLFTLLLLLLLSLHVASVVRFTLPM	GR		?	N	N	Y
189_1	MLGCFFAFLTWSRIAVVAVFLAVAVVGGDA	GEVYFFWRGLRFFGVGIRGVFGGVRPQR	CGGRTSDGVLLVMSLCFVSGVFVGVLPILKFLRIFLSIHLSFLGLDCAVVRSFLVLVHDVLFTLLLLLLLSLHVASVVRFTLPM	GR		?	N	N	Y
190_1	MLGLPFTSFLATLVTSA	EVMPSTRLMRSAVLR	ICSLPRACSARSLSTASAPSLYMQIWAFSCFLAVSTSFSAKPVLVTAANWLKAARRTFSTSLACAIA		XIV	?	N	N	N
191_1	MLGWFAKESLELPGSLPSLPVFSPCLP	SPPPSSLSPSPFSSPLSFTTQSGYER	IKEADCSRHENKYVCRYVSFDLLRNAC			?	N	N	N
192_1	MLIDQPILPPSLSLPLALIPPLSS	LRIVL	KLCMDVFNLRAFLYCFLSESMQAGDQH			?	N	N	N
193_1	MLIDQPVLPPSLSLPLALIPPLSS	LRIVL	KLCMDVFNLRAFLYCFLSESMQAGDQH			?	N	N	N
195_1	MLLLLFLLFVVGIYRT	PHIQDHRR	QHHGECCHTKASCSHS			?	Y	N	N
196_1	MLLMFFNAFGQGAEG	EREGMGSHR	NSRVGQFVNMTLLCRTMYWAPVVTIQIQSLCCLQGGSCPRYHLATSL		XXIV	?	N	N	N
197_1	MLSPSPPLCLKTLLLLLTPPPLQS	PAHMRRGRRGRRGRVRRVGRRRGKGRRRTGWRSRRVRR	GCGNWGCLTWPDGGPPCPRPCTPRTPPPPRAWRRPNLKPPQLTNRQNMHHQQHKLRKQRCPRWRM		XIV	?	N	N	N
198_1	MLVAGLLSIAASFCRPPTWP	AAPRMGRSSSSTSGIPVGHYASGRNPER	PSCPCCLINKGCLSPQETAPCSTSTKNTRPWW	R	I	?	N	N	N
199_1	MLVAGLLSIAASFCRPPTWP	VAPRMGRSSSSTSGIPVGHYASGKNPER	PSCPCCLINKGCLSPQETAPCSTSTKNTRPWW	R	I	?	N	N	N
200_1	MLVTITLQEPHVAYGAVVCLLDASSAQG	QMVLWMHQKR	GEEIDGSGCRVVGVEGKGCRGEISLSCLL			?	N	N	N
201_1	MLVVGLLSIVASFCRPPTWP	AAPRMGRSSSSTSGIPVGHYASGRNPER	PSCPCCLINKGCLSPQETAPCSTSTKNTRPWW	R	I	?	N	N	N
203_1	MMFRLTLLCCVLLVIVPMNLA	VDHPGNKR	GDSCSLSQCPCKSPDFCCDGRCGDLSECSSPAFQC		XIII	?	N	N	N
204_1	MMGQLLASFFLPAGSGSLS	DR	QQALAAELFKSVGDIFFYLVKCLTTCFLKGGGGDDTKMFLFSPTQVVFYCVDYEAVQSSAQRGICCILCTTVECCCCCCTHCRVTTTGWKNACVSEQIYLFTRLSVLGVRMLTASA			?	Y	N	N
205_1	MMLIGISLSIHLWSRFSGLAA	KFMVSQISFHLWQLTGR	LVSLHRNPFVSDSFFLDPYHCTSKISPFTTFFFEFFSLSLVCDDRSTITCLYWGHDLS	K		?	N	N	N
206_1	MMLIGISLSIHLWSRFSGLAA	KFMVSQISFHLWQLTGR	LVSLHSNPFVSDSFFLDPYHCTSKISPFTTFFFEFFSLSLVCDDRSTITCLYWGHDLS	K		?	N	N	N
208_1	MMLWFFDICCLIHVCALLSFSKIFP	IPRPQDR	PTSCSFVPQSFSTQKVAHVPSTSITSWFEEDTQQTSCH	RR		?	N	N	N
209_1	MNCLQPLLILLLISTITA	FYQDGRATQRRGRTVR	TMSNLLNMQTRECPKGCPVSCPSGSSSECCDGIVCSKNHVLDKFFCAGCGGGGGE		XIII	?	N	N	N
210_1	MNMWMTFSVCVVVVMAATVVGS	TPLQEQGLGLDER	RNPGCCPWEFYDCLIQRRVWRTRLDFCYNQASRICAPGRSGGCCPGLLRCFERCRARDSAVCYYRCKFASCWM			?	N	N	N
211_1	MNPHGYNPVFLLLLVTFWRESYG	WKTQTDR	EALWCRGYKLPTTRAGSGAACCLGSCHRAPSLRPYHNSSPLAVQIQGTESSTSRYL		XXIV	?	N	N	N
212_1	MNTAGPLLLLCLALGLLFESLG	IPVADDVEADRDTNPDDEDPR	DLDPFETSEVACGSGTCRFGCCETINEQEECKELTCD		VI/VII	?	N	N	N
213_1	MNTVAFLLLRLQGVLLLGLHLEG	VPVFVLVVVVIFPLHRLLLTGR	CVPTAGAGFLLLLRHVILLARLCGRPLLLWFLALRSCSPCCCCCIGF			?	N	N	N
215_1	MPRISAIFAYILWETLVVAPHTYA	LHEDNIELKTK	IIMCTPDYPRNFMKPELYGTFFSCE			?	N	N	N
216_1	MQLVCLGTWLRDSWA	WIFLLLRRR	QGAKMMASPFTDILVLSSCIATFARWKVILSKRSRLGLGSFSITANIHCTCSLRSLISAP	RRNSS		?	Y	N	N
217_1	MRCLPAFILLLLVVSSAPG	VDVRSKTKNIVTLASLRDFAKKTLKR	FYTQPECCPRSILCCDV	R	V	?	N	Y	N
222_1	MRFAFVVPVSLEFIAHS	AMELMRVQKSHR	KDLCWDWTYDLVHDANHCSY	RRHIFVKTKKQ		?	N	N	N
223_1	MRIKLWSPPSPCMAAAVAPCGGEA	VIVDGVAGADVGGEVR	VADILAVMLSCCCTSCWVRRSTCASSCLIFWSC		IV	?	N	N	N
224_1	MSDTALCYPLFFLLLEVNILELRTSCCHA	ALSQKVKVYFFWSVFSHVKNISFSRLLKEK	TGSFESVYCNGVAVRLKKMSVELFKFCILCCILKCHLTFSGSQTLSY		XVI	?	N	Y	N
229_1	MSHWDAALTHCGPAPLAVWAGCHS	LGVR	QWCQCPSIFPDRWARTGVMPNNRHTRRDNASLAGRDGRASLTVFSRLACTPAGLLSGLKCRGSLSSAKTTATVTSHLRRPVTEKALRCLGRS	R	XIV	?	Y	N	N
230_1	MSLFCITRVGLCTGILGIFIKPGGSLS	YEWNGWKR	EILALQMFFINCVPLTFFPLHMKLRMSELVMLLIVDVLEYVSNVEVRLGWCCVFFCYPIHCVS		I	?	N	N	N
231_1	MSTLGMVLLLLLLLLPLGNS	DGDGDRQAMDRDRTAGEARSLPRLRLKRHRDHGRSAGKR	CSTKMCGEICCPSSSCECVVHGSQGNEEGCSCPD	R	XV	?	N	Y	N
232_1	MSTLGMVLLLLLLLLPLGNS	DGDGDRQAMDRDRTVDEARSLPRLRLKRHRDHGRSAGKR	CSTKMCGEICCPSSSCECVVHGSQGNEEGCSCPD	R	XV	?	N	Y	N
233_1	MSTLGMVLLLLLLLLPLGNS	DGDGDRQAMNRDRTVDEARSLPRLHLKRHTDHGRSADKR	CSTKKCGEECCPNSSCECYVHGGTSNEAVCSCW		XV	?	N	Y	N
234_1	MSTLGMVLLLLLLLLPLGNS	DGDGDRQAMNRDRTVDEARSLPRLRLKRHRDHGRSAGKR	CSTKMCGEICCPSSSCECVVHGSQGNEEGCSCPD	R	XV	?	N	Y	N
237_1	MTKMGVMLLGLILVMPLLTLQ	EEEDGRTANHRERKSIEMDNILGRFLKR	DDDVDVPLCSSEGEYCLLNPCCSGCACVPFTDAKCHCLDD		XV	?	N	Y	N
238_1	MTLQVSFLRVTMLWPVLPLVSC	STPTPPLPSAPLSYHLPLFSR	FYFPLTCSFPAAISLDFSLMFLLSVPAVCNVLTLISSAFCISYTTATCELLRMV	KKLIPVI	XIV	?	N	N	N
239_1	MTLQVSFLRVTMLWPVLPLVSC	STPTPPLPSAPLSYHLPLFSR	FYFPLTCSFPAAISLYFSLTFLLSVPAVCNVLTLISSAFCISYTTAICTLLRMV	KKLIPVI	XIV	?	N	N	N
240_1	MVLVSNTQSVFVPIVSPVVLVSAGLS	TLTTK	SSIPPPSHPATPGPQLQCQHMTGNKNQEAMSNPTGRMMVPKNICLLFFFLFSGSFLHSTLCSCSVL		XIV	?	N	N	N
242_1	MVSAHTLIIQGLLLLPPAFLPVLNS	TNLMHVPLLLILSGR	LCHQFCKVLPVYHVCNSVFANPKLDQKPILTALLFALYVE	K		?	N	N	N
243_1	MWATLLVSGGVECLGSACLA	REKHVTRRWMDR	QACPPSSLSAQSDVCVRVV			?	Y	N	N
244_1	MWLSFILQLITPLFVSA	LLVGR	KCNLRGIYSNICCNICINFIYSIFHH	KKQ	XXIV	?	N	N	N
245_1	MWLTFVLHLITPLFVSA	LLVGR	KCNLRGIYSNICCNICINFVYSIFHH	KKQ	XXIV	?	N	N	N
246_1	MWNDPRKMLILYFFFISLELG	EKTGKLRKYLVR	YITTAVDFFCCFKCQLRVCTGTLLVLTLST		I	?	N	N	N
247_1	MWTPSLLPIFSALWSLL	KISMVKKKNKGKK	VAICWLFSCSLNLVQRNVHLICTQLQFPPPSSVPRFLSLYPHLDLPLWMQSVSRNVADYSDVGTFDVVNPYSPGLDRTTDIEHQVLWTL			?	N	Y	N
248_1	MWVPPMYLLTTSLLGRGWG	TPHSPAGKATSR	WCIRLAVTSWCCILIRTTPPHFPSLRLALRVVCH		XXIV	?	N	N	N
249_1	MYSIISFPILGVSFCLQ	SPPLKMSIQDR	VCILVRGANMACINGRIRI			?	N	N	N
5_5	MKLTCVLIVAVLFLTACQLIAA	DDFRDLQKFPRRKMSDRMPNTKGVER	DCLPPLTWCSMTDDECCNDCVLFLCSLA		VI/VII	O1	N	Y	N
37_2	MEKLTILLLVAAVLLSSQVLVQS	DEEEAQKATNDYFTATKLSGNKHSR	KGCLWSGRRCSHDRECCTTFCKHRVWKCY		VI/VII	O2	N	Y	N
96_2	MSGLGIMVLTLLLLVFMATSHQ	DAGEKQATQRDAINVRRRRSLTQR	AVSEACEESCEDEEKHCCHDNNGVYSCAVICW	G	VI/VII	O3	N	Y	Y
225_1	MSGLGIMVLTLLLLVFMETSHQ	DAGEKQAMQRDAINVRRRRSLAQR	AVTEECEESCEDEEKHCCYVTNGQPSCARICW	G	VI/VII	O3	N	Y	Y
226_1	MSGLGIMVLTLLLLVFMETSHQ	DAGEKQATQRDAINVRRRRSLAQR	AVTEECEESCEDEEKHCCYVTNGQPSCARICW	G	VI/VII	O3	N	Y	Y
227_1	MSGLGIMVLTLLLLVFMETSHQ	DAGEKQATQRDAINVRRRRSLTQR	AVSEACEESCEDEEKTCCHDNNGVYSCAVICW	G	VI/VII	O3	N	Y	Y
228_1	MSGLGIMVLTLLLLVYMETSHQ	DAGEKQATQRDAINVRRRRSLTRR	TVTEECEESCEDEEKHCCRINNGVYSCAAVCW	G	VI/VII	O3	N	Y	Y
69_2	MLCLPVFIILLLLASPAAS	DPLEKRIQSDLIRAALEDADTKNDPR	LVGTLVSTALTACCQFEVLNFCCIST		V	T	N	Y	N
93_2	MRCLPVFIILLLLIPSASSVDA	QPKPKNDLLLAPFHDNAKRTLQLLRNK	RICCPWFALCCYYGYF	G	V	T	N	N	Y
219_1	MRCLPVFIILLLLIPSASSVDA	QPKTKDDVLLAPFHDNAKRTLQLLRNK	RICCPWFALCCYYGYF	GR	V	T	N	N	Y
